# Supplementary material for: Plasmonic core–shell ionic microgels for photo-tuning catalytic applications
Source: Royal Society of Chemistry journal article supplement (doi:10.1039/c7nj03661b), 2018-01-01
Supplement: c7nj03661b1.pdf [file c7nj03661b1.pdf]

## Plasmonic Core-Shell Ionic Microgels for Photo-Tuning Catalytic Applications

Yitong Wang, Ling Wang, Jingcheng Hao, Shuli Dong\*

*Key Laboratory of Colloid and Interface Chemistry & Key Laboratory of Special Aggregated Materials, Shandong University, Ministry of Education, Jinan 250100, P. R. China.*

\* Corresponding author. Tel: +86-531-88363768.

E-mail: shuli@sdu.edu.cn

## Supplementary Figures

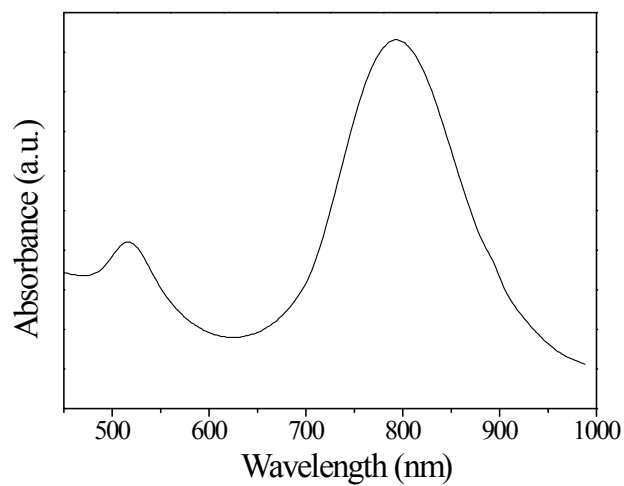

**Figure S1.** UV-Vis spectra of Au nanorods.

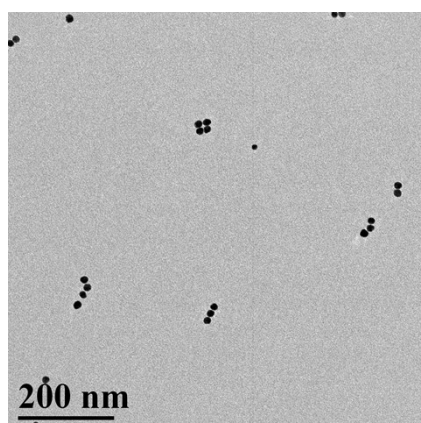

**Figure S2.** TEM image of Au nanoparticles.

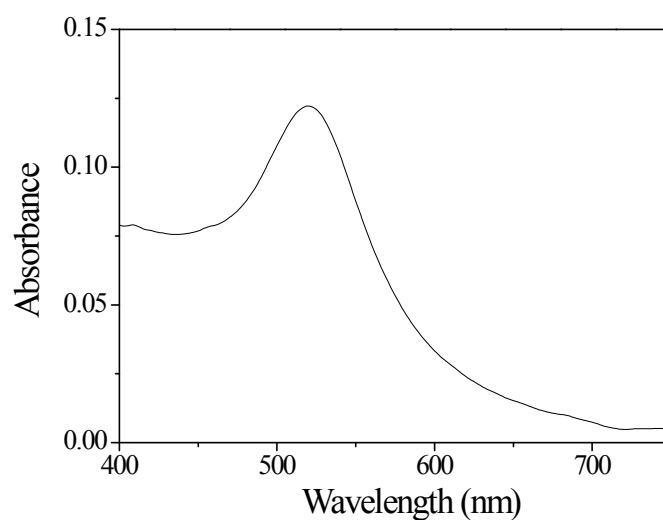

**Figure S3.** UV-Vis spectra of Au nanoparticles.

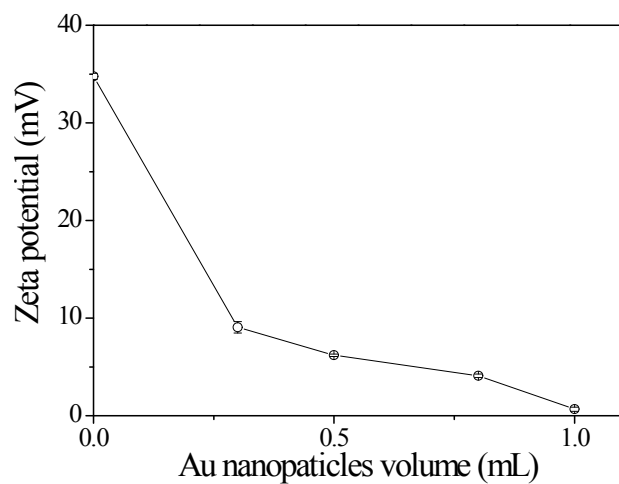

**Figure S4.** Zeta potential of Au NRs@PNV (200 μL) with the addition of Au nanoparticles.

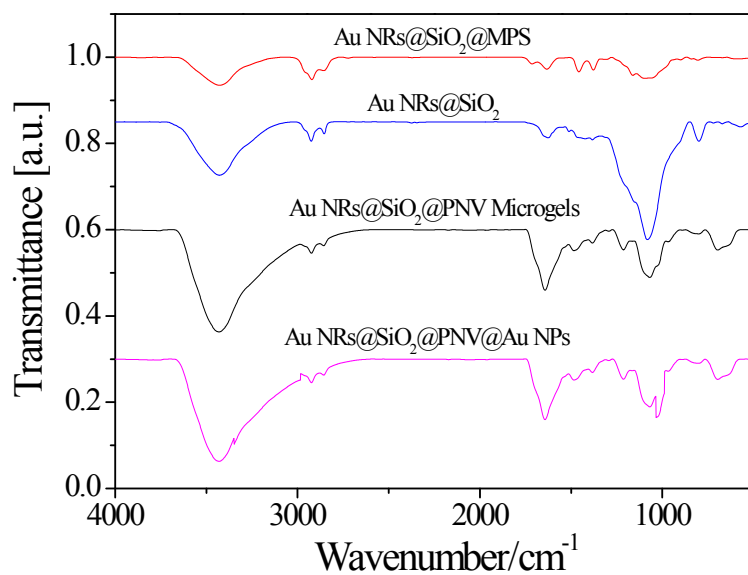

**Figure S5.** FTIR spectra of AuNRs@SiO<sub>2</sub>, AuNRs@SiO<sub>2</sub>@MPS, AuNRs@SiO<sub>2</sub>@PNV microgels and AuNRs@SiO<sub>2</sub>@PNV@Au NPs.

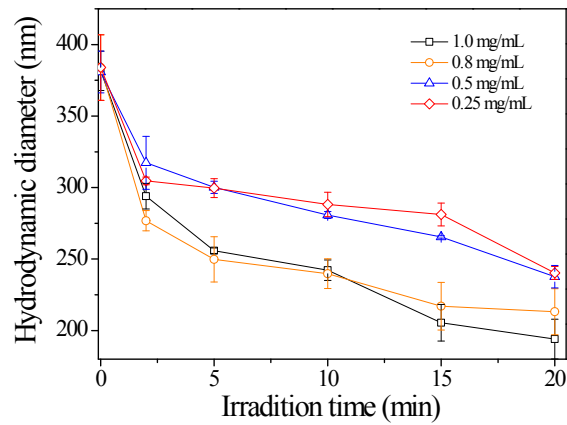

**Figure S6.** Variation of hydrodynamic diameter of Au NRs@PNV microgels with different concentrations as a function of NIR laser.

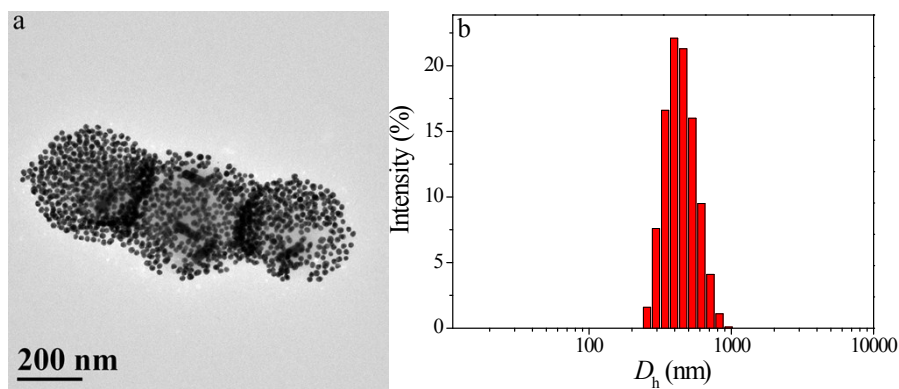

**Figure S7.** TEM image (a) and hydrodynamic diameter (b) of the nanocomposites after being irradiated.

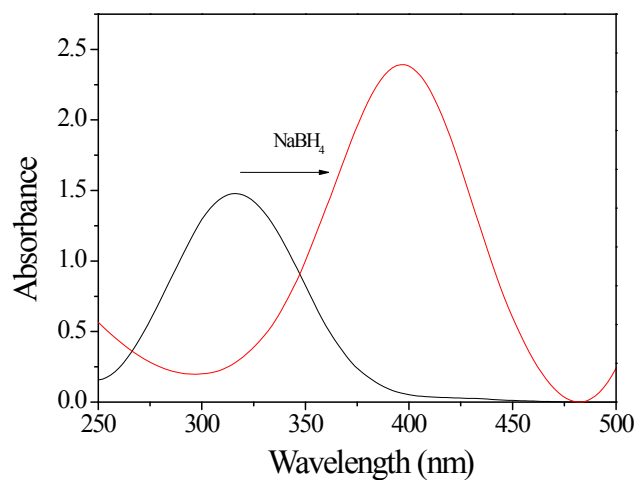

**Figure S8.** UV-Vis spectra of 4-NP before and after adding  $\text{NaBH}_4$  aqueous solution.

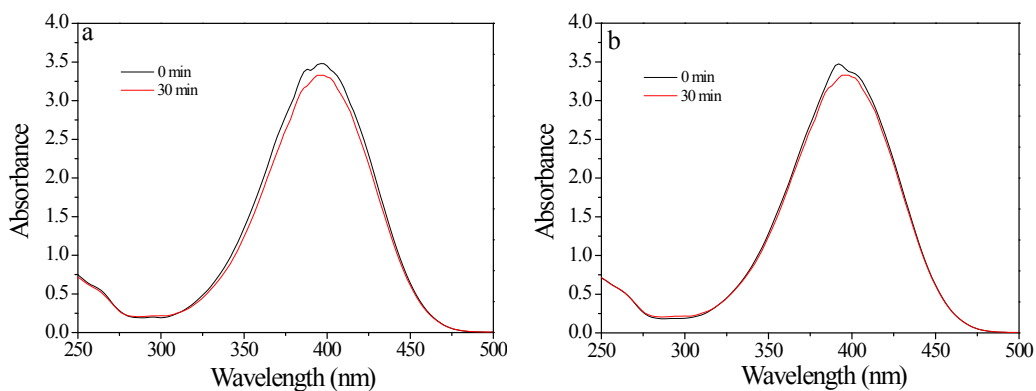

**Figure S9.** Time-dependent UV-Vis absorption spectra for the reduction of 4-NP with  $\text{NaBH}_4$  in the presence of laser irradiation (a) and Au NRs (b).

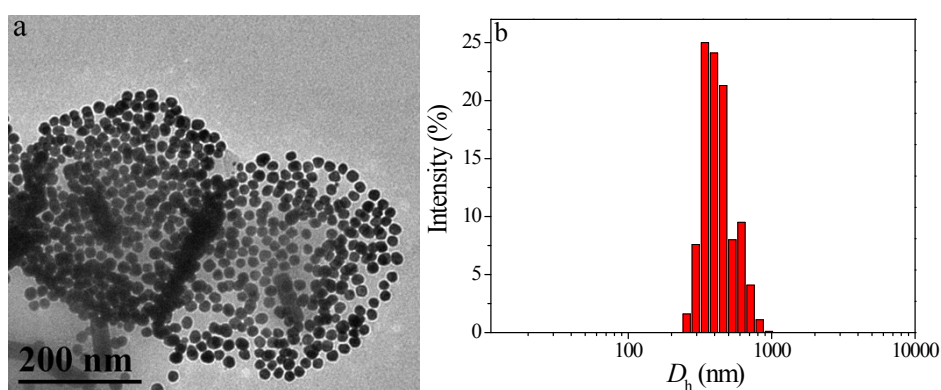

**Figure S10.** TEM image (a) and hydrodynamic diameter (b) of the nanocomposites after catalytic reaction.

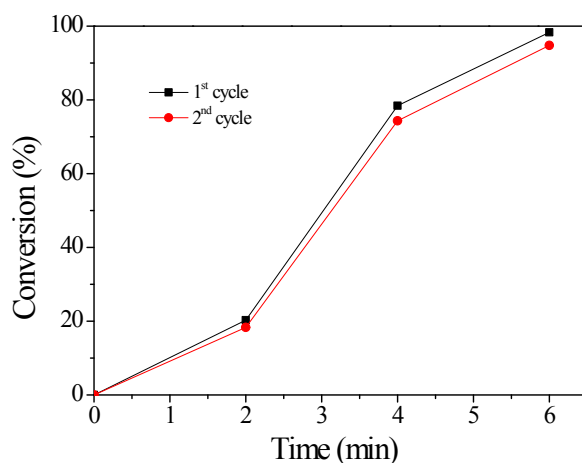

**Figure S11.** Catalytic activity of Au NRs @PNV microgel@Au NPs catalyst after two cycles.

**Table S1.** Summary of rate constants of other similar 4-nitrophenol reduction reactions catalyzed by previously reported Au-based catalysts.

| No | Catalyst                           | Time (s) | Rate constant, $\kappa$ , ( $s^{-1}$ ) | Reference                                                   |
|----|------------------------------------|----------|----------------------------------------|-------------------------------------------------------------|
| 1  | Au@SiO <sub>2</sub>                | 1800     | $14 \times 10^{-3}$                    | <i>Adv. Mater.</i> <b>2008</b> , <i>20</i> , 1523.          |
| 2  | Au@CPF-1                           | 720      | $5.05 \times 10^{-3}$                  | <i>Chem. Eur. J.</i> <b>2016</b> , <i>22</i> , 17029-17036. |
| 3  | Au <sub>(0)</sub> @TpPa-1          | 780      | $5.35 \times 10^{-3}$                  | <i>Chem. Commun.</i> <b>2014</b> , <i>50</i> , 3169-3172.   |
| 4  | Au@MgO                             | 420      | $7.60 \times 10^{-3}$                  | <i>Green Chem.</i> <b>2012</b> , <i>14</i> , 3164-3174.     |
| 5  | Au core/porous shell nanoparticles | 286      | $3.65 \times 10^{-3}$                  | <i>Nanoscale</i> , <b>2016</b> , <i>8</i> , 11707-11717.    |
| 6  | Au NRs@PNV@Au NPs                  | 240      | $18 \times 10^{-3}$                    | This work                                                   |
